# Supplementary material for: Changes in Metabolic Hormones in Malaysian Young Adults following Helicobacter pylori Eradication
Source: PubMed Central journal article supplement (PMC4546342; doi:10.1371/journal.pone.0135771), 2015-08-20
Supplement: pone.0135771.s001.pdf [file pone.0135771.s001.pdf]

| Classification       | <sup>13</sup> C-UBT |                   | <i>H. pylori</i> Serology |                     |                    | Overall <i>H. pylori</i> Status |                   |                       |                   |
|----------------------|---------------------|-------------------|---------------------------|---------------------|--------------------|---------------------------------|-------------------|-----------------------|-------------------|
|                      | Positive            | Negative          | Positive (IgA only)       | Positive (IgG only) | Positive (IgA+IgG) | Seropositive                    | Seronegative      | Positive <sup>a</sup> | Negative          |
| <b>Total</b>         | <b>67 (11.7)</b>    | <b>504 (88.0)</b> | <b>120</b>                | <b>39</b>           | <b>60</b>          | <b>219 (38.2)</b>               | <b>354 (61.8)</b> | <b>57 (9.9)</b>       | <b>516 (90.1)</b> |
| <b>Ethnicity</b>     |                     |                   |                           |                     |                    |                                 |                   |                       |                   |
| Malay                | 12 (17.9)           | 225 (44.6)        | 46                        | 8                   | 10                 | 64 (29.2)                       | 173 (48.9)        | 9 (15.8)              | 228 (44.2)        |
| Chinese              | 15 (22.4)           | 160 (31.8)        | 25                        | 19                  | 23                 | 67 (30.6)                       | 109 (30.8)        | 12 (21.0)             | 164 (31.8)        |
| Indian               | 37 (55.2)           | 112 (22.2)        | 48                        | 12                  | 24                 | 84 (38.4)                       | 66 (18.6)         | 33 (57.9)             | 117 (22.7)        |
| Other                | 3 (4.5)             | 7 (1.4)           | 1                         | 0                   | 3                  | 4 (1.8)                         | 6 (1.7)           | 3 (5.3)               | 7 (1.3)           |
| <b>Gender</b>        |                     |                   |                           |                     |                    |                                 |                   |                       |                   |
| Male                 | 28 (41.8)           | 217 (43.1)        | 64                        | 12                  | 20                 | 96 (43.8)                       | 149 (42.1)        | 22 (38.6)             | 223 (43.2)        |
| Female               | 39 (58.2)           | 287 (56.9)        | 56                        | 27                  | 40                 | 123 (56.2)                      | 205 (57.9)        | 35 (61.4)             | 293 (56.8)        |
| <b>Indeterminate</b> | <b>2 (0.3)</b>      | <b>2 (0.3)</b>    | -                         | -                   | -                  | -                               | -                 | -                     | -                 |

<sup>a</sup>UBT with IgA and/or IgG positive were considered as *H. pylori* positive.
