# Supplementary material for: Changes in Metabolic Hormones in Malaysian Young Adults following Helicobacter pylori Eradication
Source: PubMed Central journal article supplement (PMC4546342; doi:10.1371/journal.pone.0135771), 2015-08-20
Supplement: pone.0135771.s002.pdf [file pone.0135771.s002.pdf]

| <b>Histology<sup>a</sup></b> | <b>Scale, N (%)</b> |             |                 |               |
|------------------------------|---------------------|-------------|-----------------|---------------|
|                              | <b>Absent</b>       | <b>Mild</b> | <b>Moderate</b> | <b>Marked</b> |
| <b>Neutrophils</b>           | 1 (6)               | 5 (31)      | 7 (44)          | 3 (19)        |
| <b>Mononuclear cells</b>     | -                   | -           | 4 (25)          | 12 (75)       |
| <b>Atrophy</b>               | 16 (100)            | -           | -               | -             |
| <b>Intestinal metaplasia</b> | 15 (93.8)           | 1 (6.2)     | -               | -             |

<sup>a</sup>Only sixteen RUT positive antral biopsy samples were evaluated for histology analysis.
